# Supplementary material for: Nanoparticle conjugation enhances the immunomodulatory effects of intranasally delivered CpG in house dust mite-allergic mice
Source: PubMed Central journal article supplement (PMC4585708; doi:10.1038/srep14274), 2015-09-21
Supplement: srep14274-s1.pdf [file srep14274-s1.pdf]

## **Nanoparticle conjugation enhances the immunomodulatory effects of intranasally delivered CpG in house dust mite-allergic mice**

Authors:

Marie Ballester\*<sup>1</sup>, Laura Jeanbart\*<sup>1,2</sup>, Alexandre de Titta<sup>1</sup>, Chiara Nembrini<sup>1</sup>, Benjamin J. Marsland<sup>4</sup>, Jeffrey A. Hubbell<sup>1,3,5,6</sup>, Melody A. Swartz<sup>1,2,3,5</sup>

Author affiliations:

<sup>1</sup>Institute of Bioengineering, <sup>2</sup>Swiss Institute for Experimental Cancer Research (ISREC), and  
<sup>3</sup>Institute for Chemical Sciences and Engineering; Ecole Polytechnique Fédérale de Lausanne (EPFL), Switzerland

<sup>4</sup>Faculty of Biology and Medicine, Université de Lausanne (UNIL), Switzerland

<sup>5</sup>Institute for Molecular Engineering, University of Chicago, USA

<sup>6</sup>Materials Science Division, Argonne National Laboratory, USA

\*These authors contributed equally to this work.

Corresponding author:

Melody A. Swartz, Institute of Bioengineering, School of Life Sciences and Engineering, EPFL, SV IBI LLCB, AI 1106, Lausanne, 1015, Switzerland. Phone: +41 21 693 9686; Fax: +41 21 693 9685; E-mail: melody.swartz@epfl.ch

## Supplementary Information

### Supplementary Figure

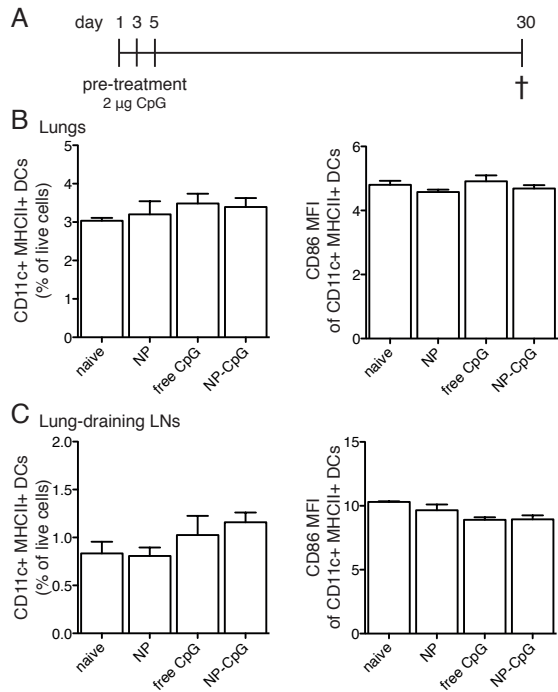

### Supplementary Figure. NP-CpG does not have a long-term effect on DCs in lungs and lung-draining lymph nodes following pulmonary delivery

Mice received 2 µg CpG (free or NP-conjugated) via the pulmonary route on days 1, 3, and 5. Mice were sacrificed on day 30. The NP group received an equivalent dose of NPs only as in the NP-CpG group. (A) Experimental timeline. Analysis of dendritic cells (DCs) in the lungs (B) and lung-draining LNs (C): (*left*) frequencies of CD11c<sup>+</sup> MHCII<sup>+</sup> DCs as percentage of live cells, (*right*) relative expression levels (mean fluorescence intensity, MFI) of CD86 expression by CD11c<sup>+</sup> MHCII<sup>+</sup> DCs. Data represent mean ± SEM, 4-5 mice per group.
